# Supplementary material for: Unique MOF-derived hierarchical MnO2 nanotubes@NiCo-LDH/CoS2 nanocage materials as high performance supercapacitors
Source: Royal Society of Chemistry journal article supplement (doi:10.1039/c9ta01951k), 2019-01-01
Supplement: c9ta01951k1.pdf [file c9ta01951k1.pdf]

## Supporting Information

### Unique MOF-derived hierarchical $\text{MnO}_2$ nanotubes@NiCo-LDH/ $\text{CoS}_2$ nanocages materials as high performance supercapacitor

*Xiuhua Wang<sup>1\*</sup>, Feifei Huang<sup>1</sup>, Fang Rong<sup>1</sup>, Peng He<sup>1</sup>, Ronghui Que<sup>1\*</sup>, SanPing Jiang<sup>2\*</sup>*

<sup>1</sup> Anhui Key Laboratory of Molecule-Based Materials, The Key Laboratory of Functional Molecular Solids, Ministry of Education, College of Chemistry and Materials Science, Anhui Normal University, Wuhu 241000, China

<sup>2</sup> Fuels and Energy Technology Institute & Western Australia School of Mines: Minerals, Energy and Chemical Engineering Curtin University Perth, Western Australia 6102, Australia

#### List of figures.

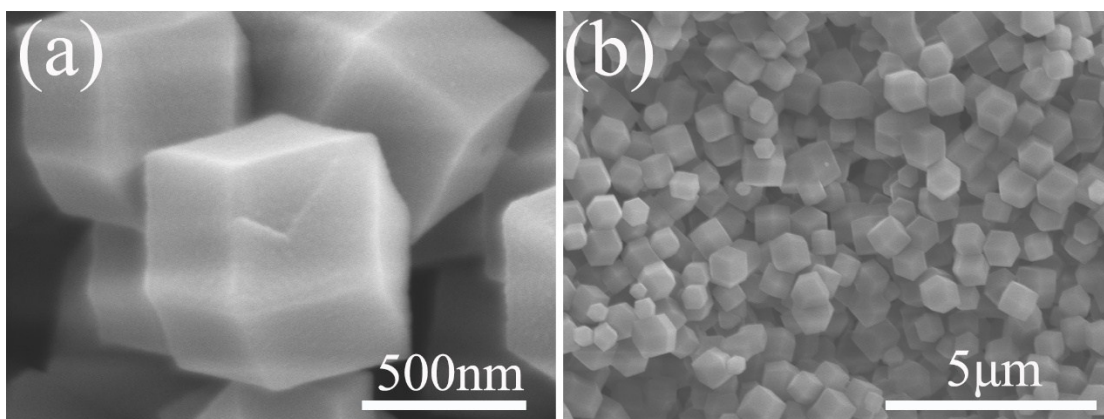

**Figure S1.** SEM images of the prepared ZIF-67 without the presence of  $\text{MnO}_2$  nanotubes (a) in high and (b) in low magnifications.

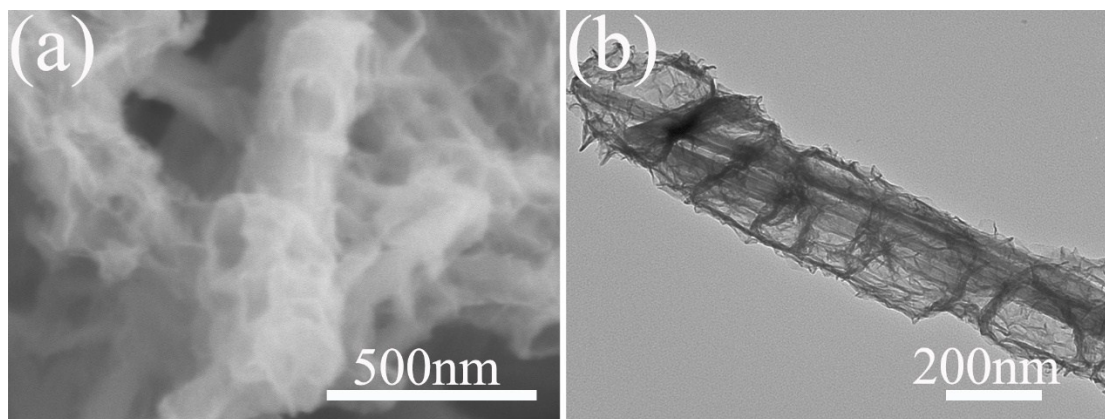

**Figure S2.** (a) SEM and (b) TEM images of  $\text{MnO}_2@\text{NiCo-LDH-1}$  (50 mg, 5 h).

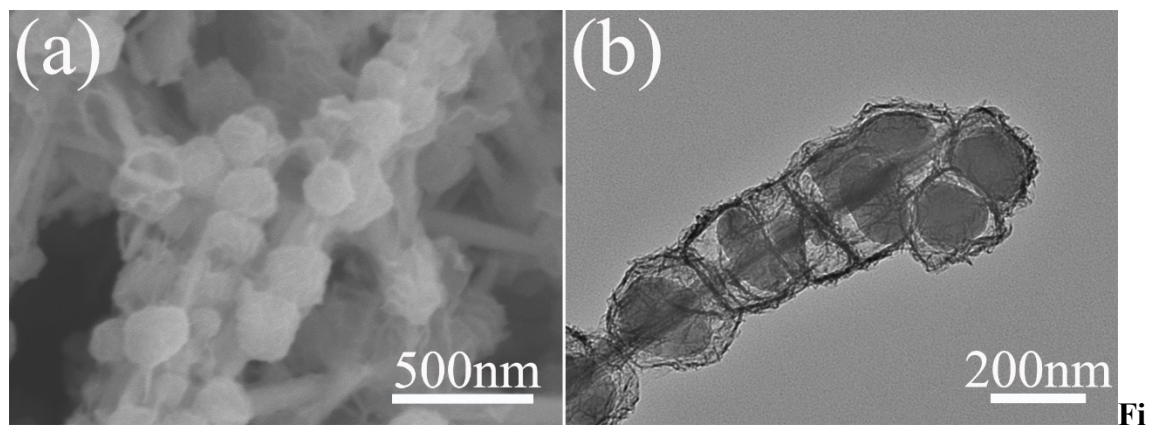

**Figure S3.** (a) SEM and (b) TEM images of  $\text{MnO}_2@\text{NiCo-LDH-2}$  (100 mg, 2.5 h).

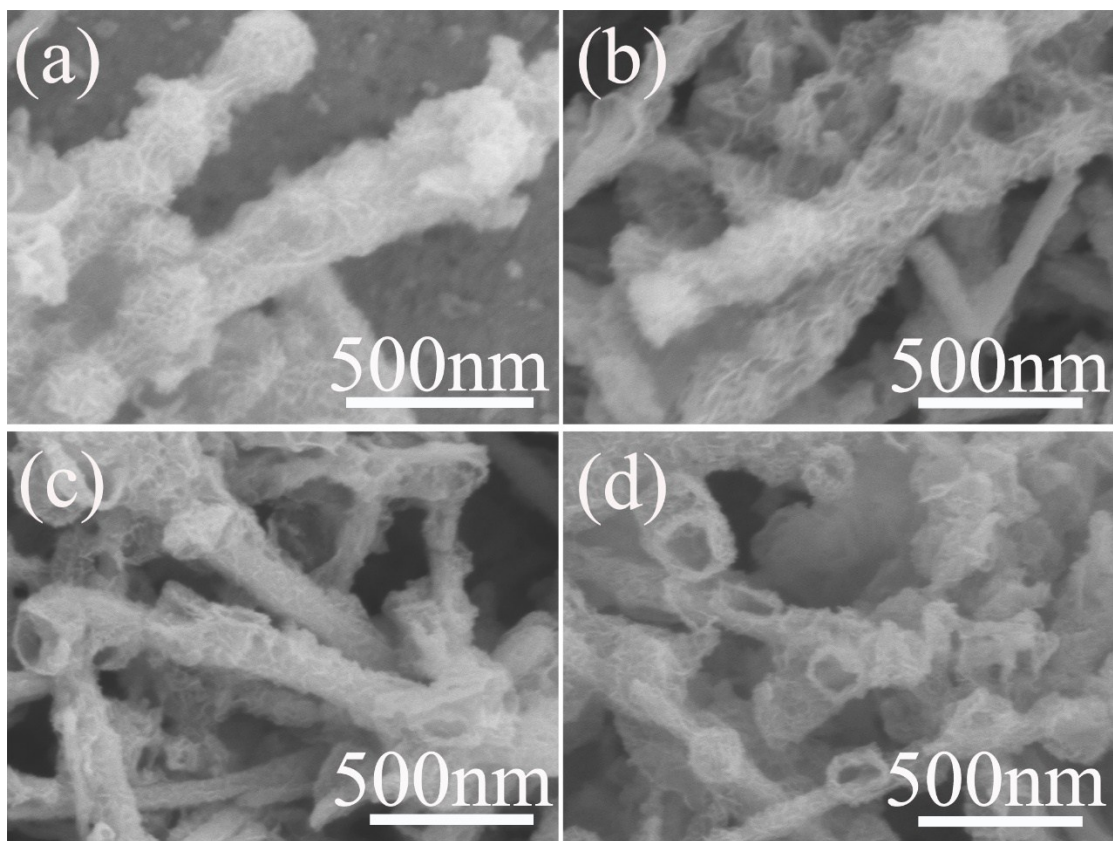

**Figure S4.** SEM images of (a)  $\text{MnO}_2@$ NiCo-LDH/CoS<sub>2</sub>-1 (15 mg), (b)  $\text{MnO}_2@$  NiCo-LDH/CoS<sub>2</sub>-2 (30 mg), (c)  $\text{MnO}_2@$ NiCo-LDH/CoS<sub>2</sub>-3 (60 mg) and (d)  $\text{MnO}_2@$  NiCo-LDH/CoS<sub>2</sub>-4 (120 mg).

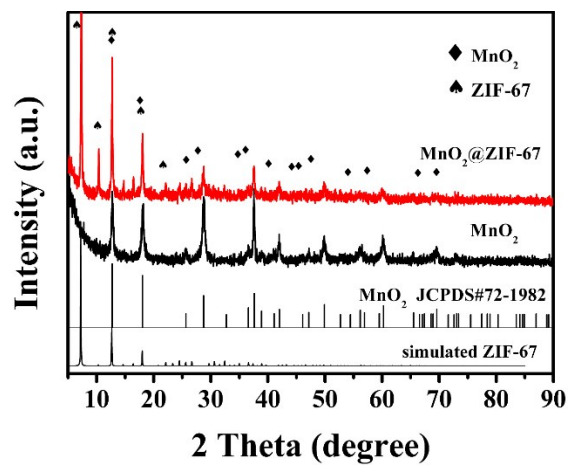

**Figure S5.** XRD patterns of prepared  $\text{MnO}_2$  and  $\text{MnO}_2@\text{ZIF-67}$ .

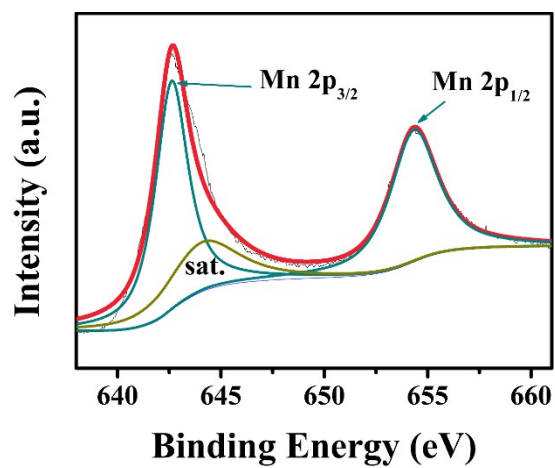

**Figure S6.** Mn 2p high resolution XPS spectrum for  $\text{MnO}_2@\text{NiCo-LDH/CoS}_2$ .

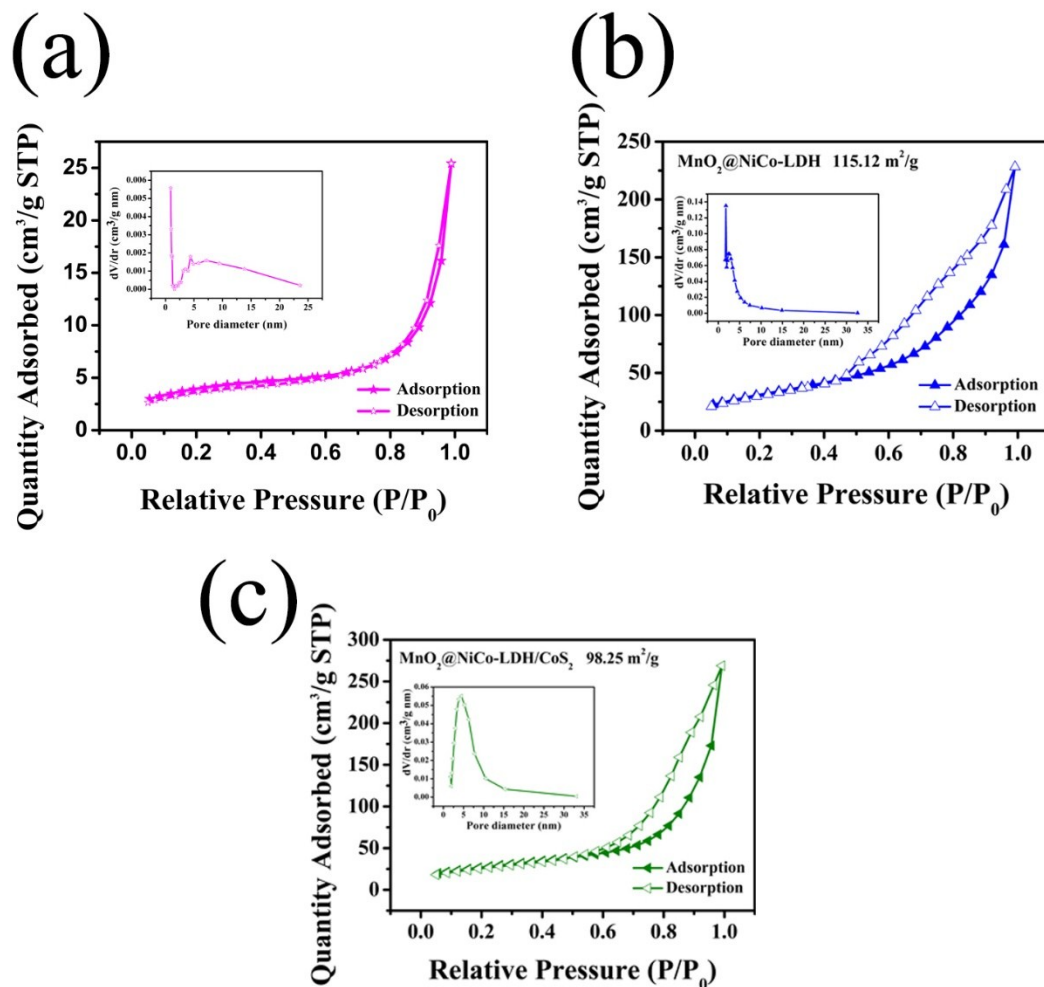

**Figure S7.**  $N_2$  adsorption/desorption isotherms of (a)  $MnO_2$ , (b)  $MnO_2@NiCo-LDH$  and (c)  $MnO_2@NiCo-LDH/CoS_2$ . The inset is the corresponding pore size distribution.

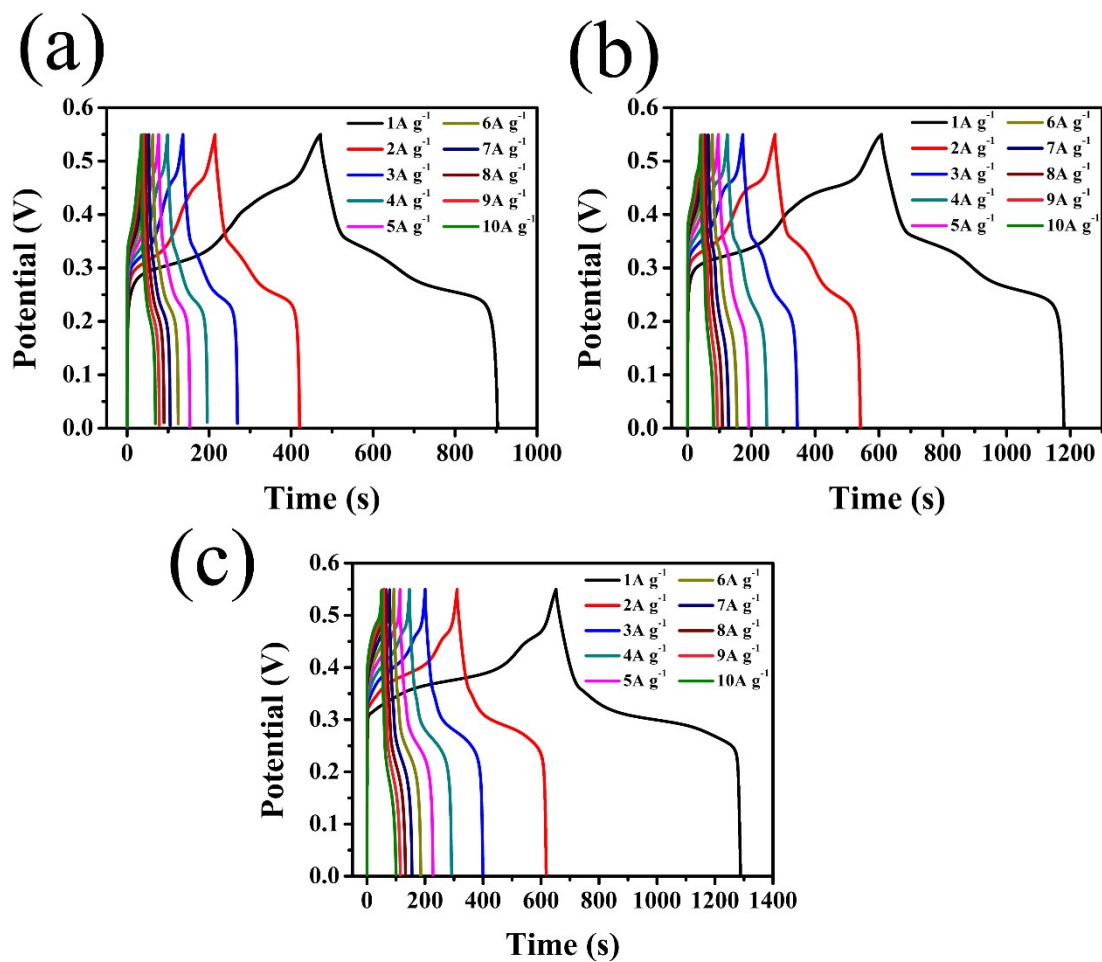

**Figure S8.** Charge–discharge profiles at various current densities for (a) MnO<sub>2</sub>@NiCo-LDH-1 (100 mg, 2.5 h), (b) MnO<sub>2</sub>@NiCo-LDH-2 (50 mg, 5 h) and (c) MnO<sub>2</sub>@NiCo-LDH (100 mg, 5 h).

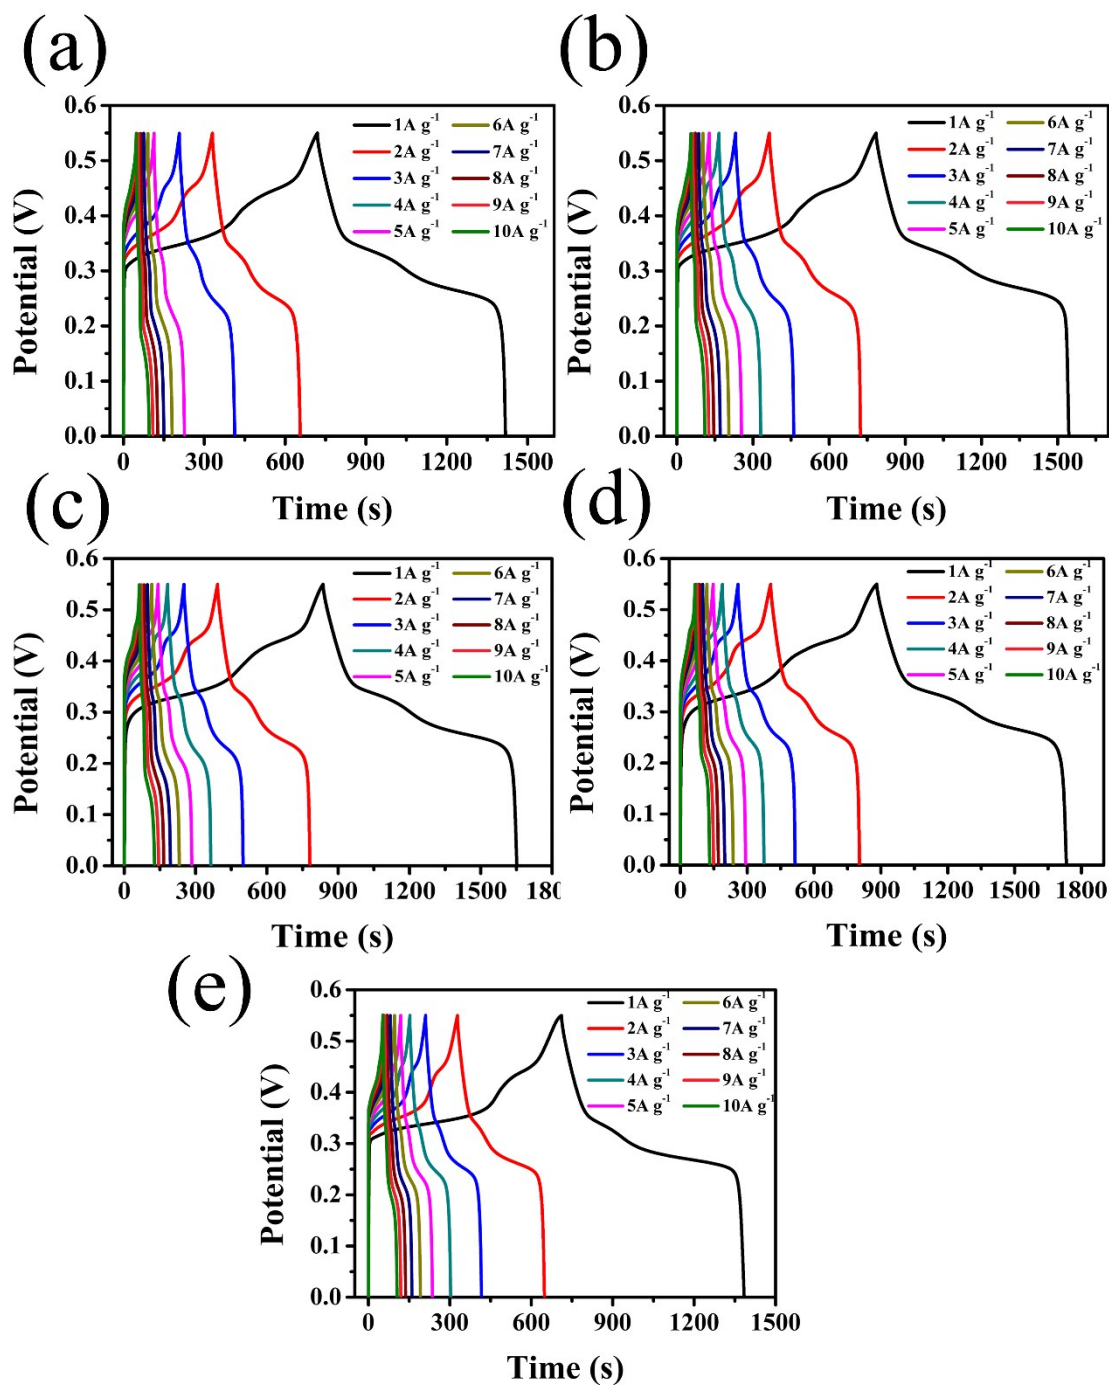

**Figure S9.** Charge–discharge profiles at various current densities for (a) MnO<sub>2</sub>@NiCo-LDH/CoS<sub>2</sub>-1 (15 mg), (b) MnO<sub>2</sub>@NiCo-LDH/CoS<sub>2</sub>-2 (30 mg), (c) MnO<sub>2</sub>@NiCo-LDH/CoS<sub>2</sub>-3 (60 mg), (d) MnO<sub>2</sub>@NiCo-LDH/CoS<sub>2</sub> (90 mg) and (e) MnO<sub>2</sub>@NiCo-LDH/CoS<sub>2</sub>-4 (120 mg).

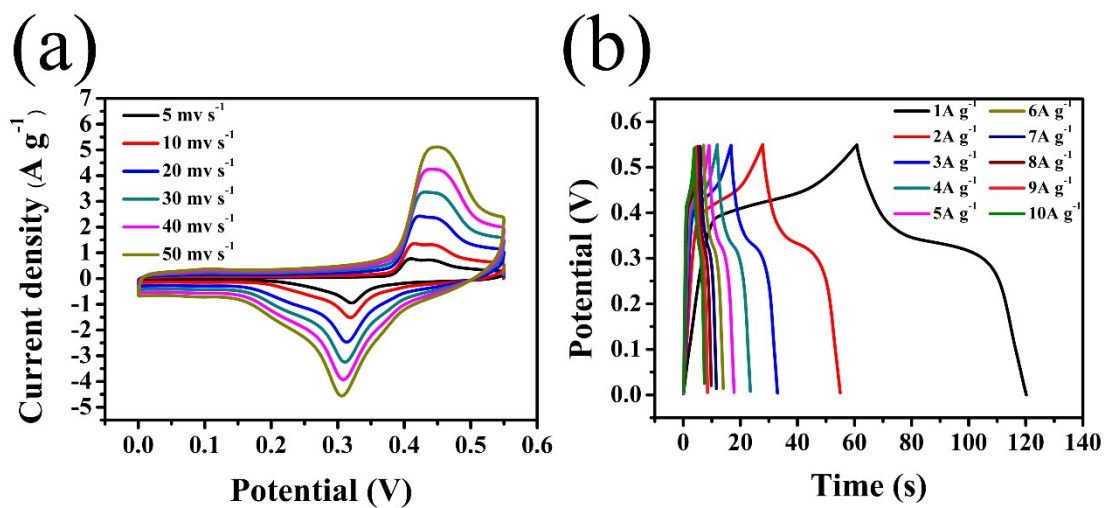

**Figure S10.** (a) CV curves at various scan rates and (b) charge–discharge profiles at various current densities for MnO<sub>2</sub>.

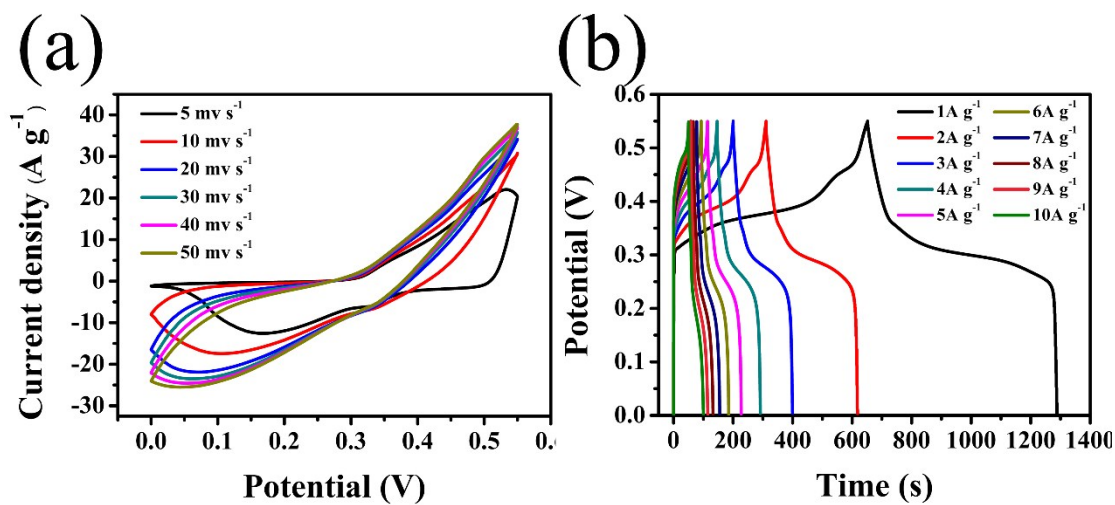

**Figure S11.** (a) CV curves at various scan rates and (b) charge–discharge profiles at various current densities for MnO<sub>2</sub>@NiCo-LDH.



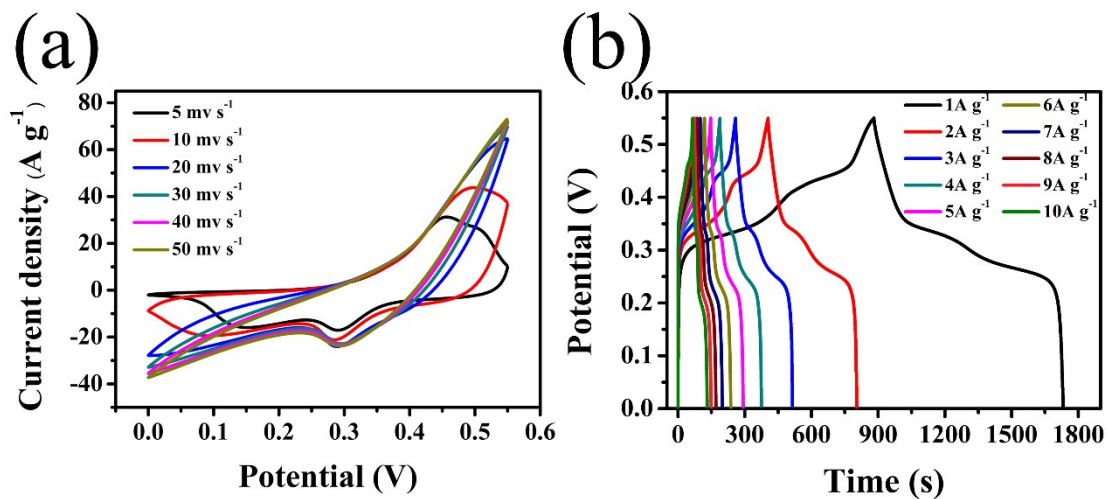

**Figure S12.** (a) CV curves at various scan rates and (b) charge–discharge profiles at various current densities for MnO<sub>2</sub>@NiCo-LDH/CoS<sub>2</sub>.

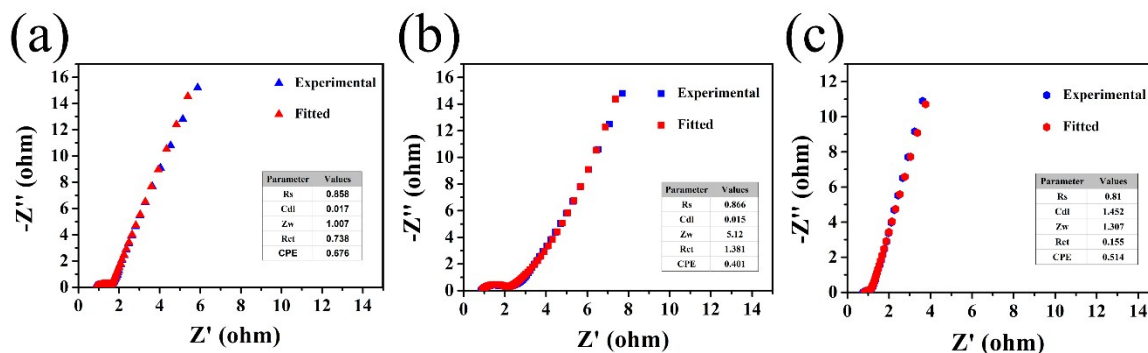

**Figure S13.** Experimental and simulated Nyquist diagrams of (a) MnO<sub>2</sub>, (b) MnO<sub>2</sub>@NiCo-LDH and (c) MnO<sub>2</sub>@NiCo-LDH/CoS<sub>2</sub>. The insert is the corresponding simulation data.

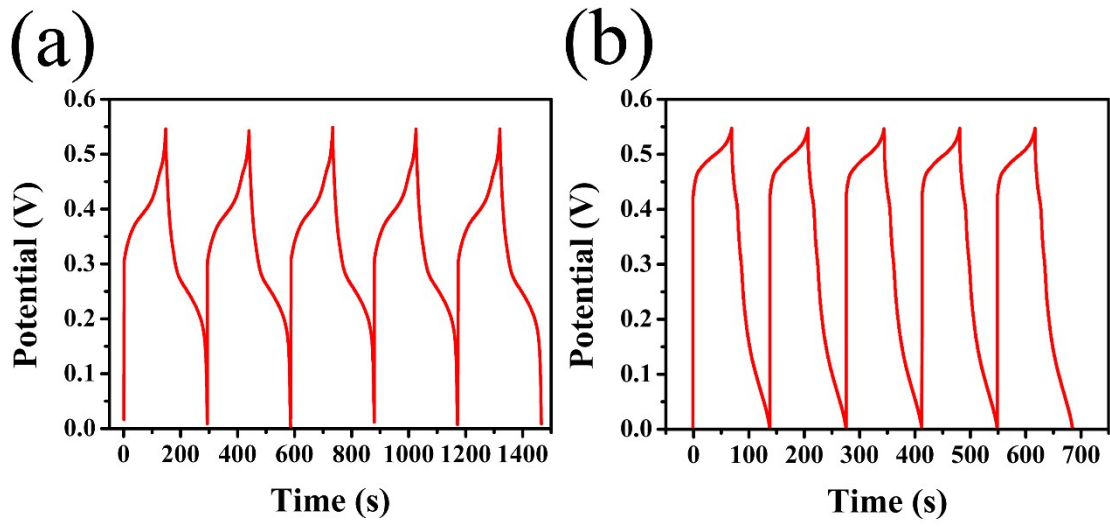

**Figure S14.** The first (a) and last (b) 5 galvanostatic charge/discharge cycles of MnO<sub>2</sub>@NiCo-LDH.

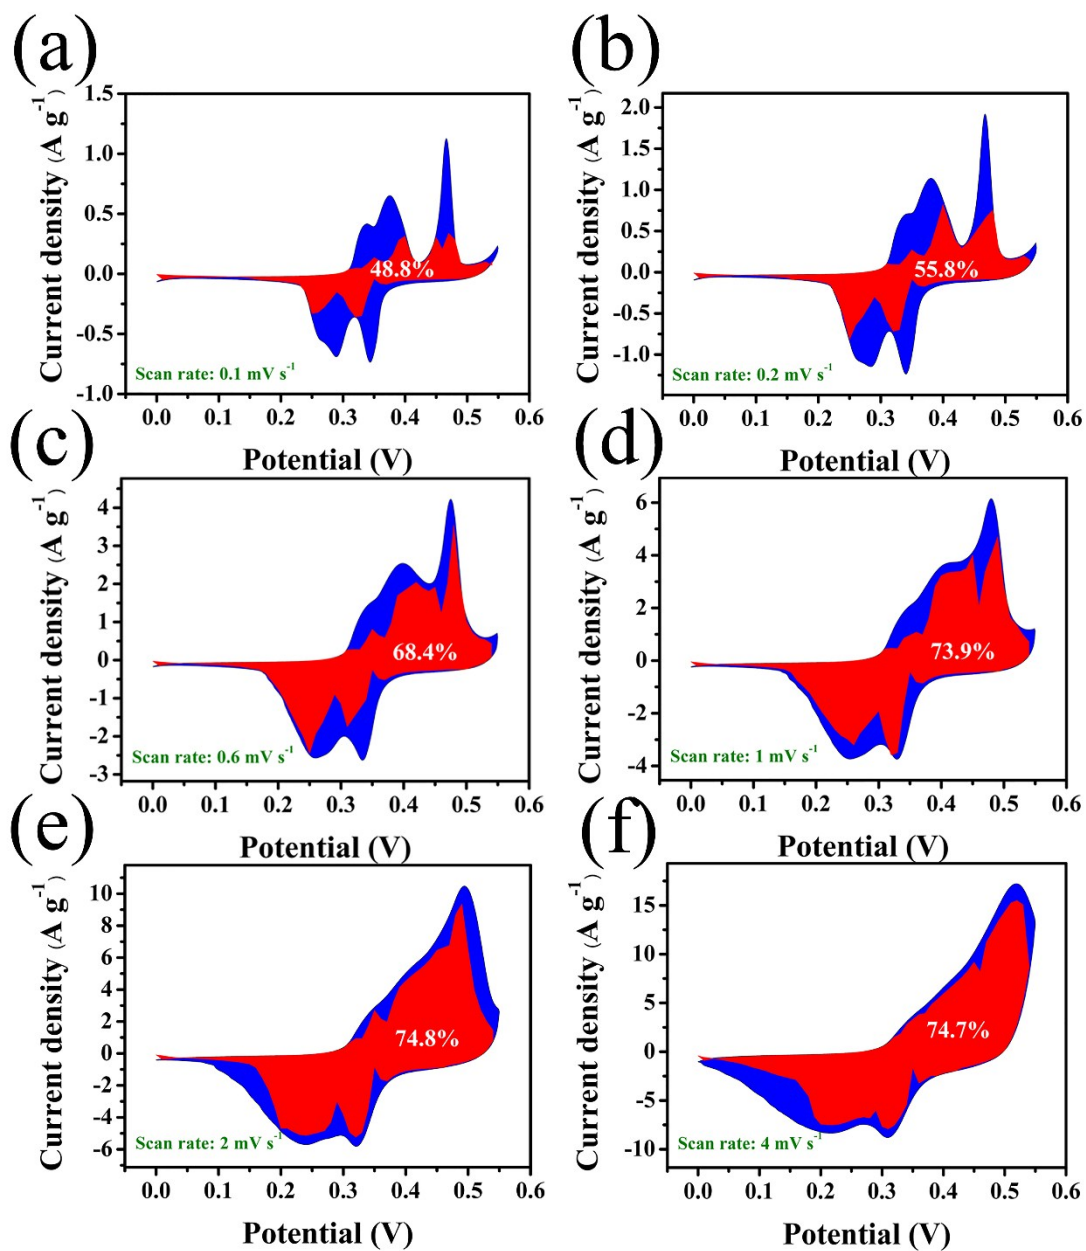

**Figure S15.** The capacitive contribution to charge storage of MnO<sub>2</sub>@NiCo-LDH at different scan rates of (a) 0.1, (b) 0.2, (c) 0.6, (d) 1, (e) 2, and (f) 4 mV s<sup>-1</sup>.

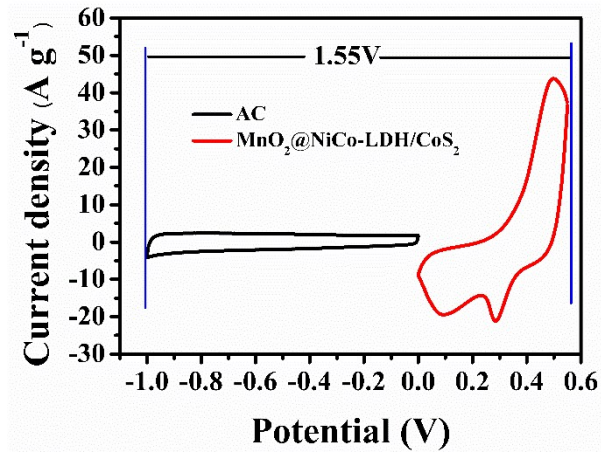

**Figure S16.** Cyclic voltammograms of AC and MnO<sub>2</sub>@NiCo-LDH/CoS<sub>2</sub> in three electrode configurations against SCE electrode showing corresponding operational voltage window.

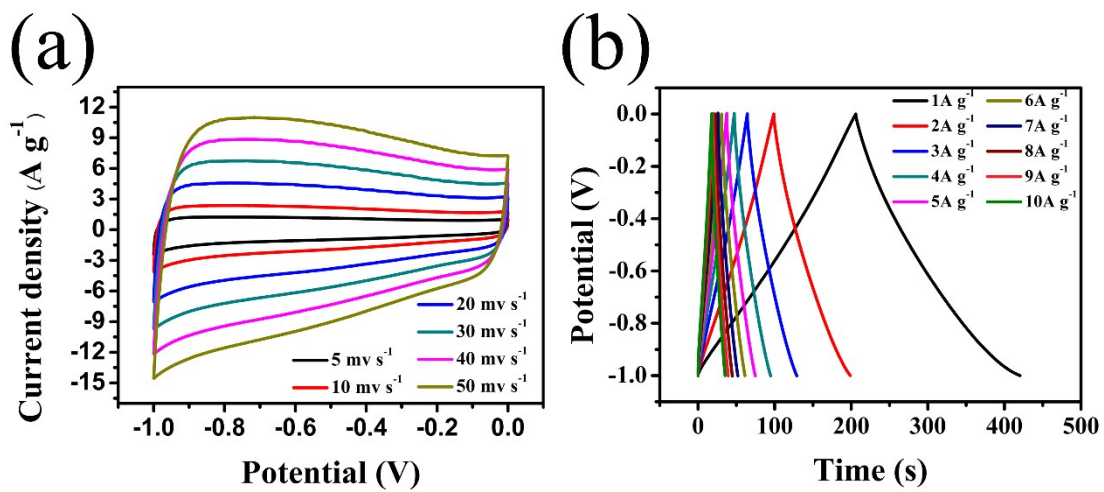

**Figure S17.** (a) CV curves at various scan rates, (b) charge-discharge profiles at various current densities for AC.

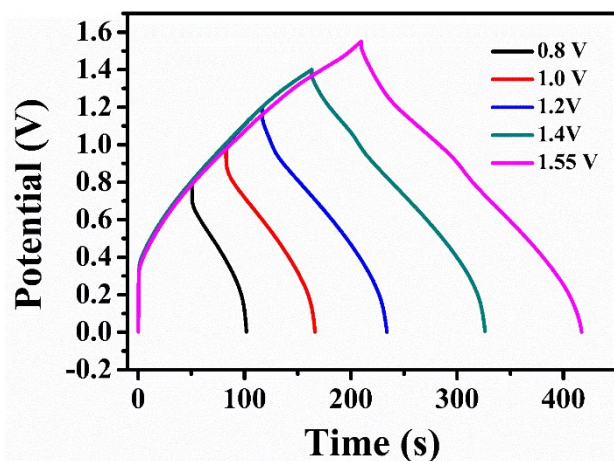

**Figure S18.** Galvanostatic current charge/discharge curves of  $\text{MnO}_2@\text{NiCo-LDH}/\text{CoS}_2//\text{AC}$  asymmetric supercapacitor under different potential windows.

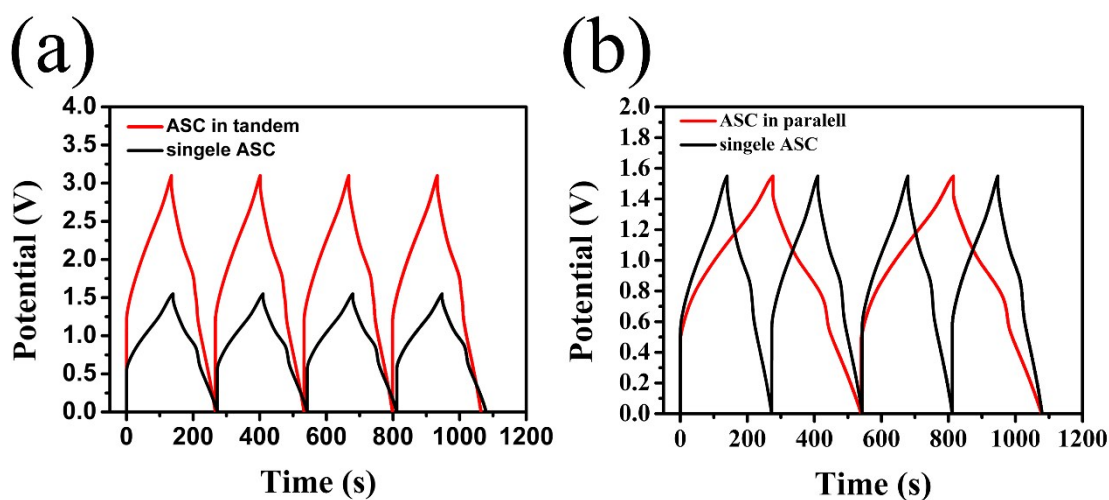

**Figure S19** (a) GCD curves of two pieces of  $\text{MnO}_2@\text{NiCo-LDH}/\text{CoS}_2//\text{AC}$  connected in series, where the working potential doubles from 1.55 V to 3.1 V as compared with one single cell. (b) GCD curves of two pieces of  $\text{MnO}_2@\text{NiCo-LDH}/\text{CoS}_2//\text{AC}$  connected in parallel, which show twice of the charge/discharge time under the same potential window as compared with one single  $\text{MnO}_2@\text{NiCo-LDH}/\text{CoS}_2//\text{AC}$  unit.

**Table S1.** Atomic percentages of the elements in MnO<sub>2</sub>@NiCo-LDH/CoS<sub>2</sub> calculated from XPS survey spectra.

| Element  | Ni    | Co   | Mn   | O     | S    | C     |
|----------|-------|------|------|-------|------|-------|
| Atomic % | 10.88 | 5.28 | 6.44 | 50.32 | 7.61 | 19.46 |

**Table S2.** Chemical composition mass percentage of MnO<sub>2</sub>@NiCo-LDH/CoS<sub>2</sub> normalized by XPS data.

| components | MnO <sub>2</sub> | Ni-Co LDH | CoS <sub>2</sub> |
|------------|------------------|-----------|------------------|
| Weight %   | 23.82            | 70.43     | 5.75             |

**Table S3.** BET surface areas, and BJH pore volume and pore radius of the samples.

| Sample                                      | SBET (m <sup>2</sup> g <sup>-1</sup> ) | Pore Volume (cm <sup>3</sup> g <sup>-1</sup> ) | Pore Radius (nm) |
|---------------------------------------------|----------------------------------------|------------------------------------------------|------------------|
| MnO <sub>2</sub>                            | 13.71                                  | 0.037                                          | 82.8             |
| MnO <sub>2</sub> @NiCo-LDH                  | 115.12                                 | 0.355                                          | 40.3             |
| MnO <sub>2</sub> @NiCo-LDH/CoS <sub>2</sub> | 98.25                                  | 0.417                                          | 60.9             |

**Table S4.** Comparison of the electrochemical performances of MnO<sub>2</sub>@NiCo-LDH/CoS<sub>2</sub> in our work with those reported in the literatures.

| Electrode                                    | Specific Capacitance                          | Capacitance Retention                                       | Mass loading             | Reference |
|----------------------------------------------|-----------------------------------------------|-------------------------------------------------------------|--------------------------|-----------|
| MnO <sub>2</sub> @Ni-Co LDH/CoS <sub>2</sub> | 1547 F g <sup>-1</sup> at 1 A g <sup>-1</sup> | 76.9% (from 1 A g <sup>-1</sup> to 10 A g <sup>-1</sup> )   | 2.0 mg cm <sup>-2</sup>  | Our work  |
| Ni-Co LDH/CNFs                               | 1613 F g <sup>-1</sup> at 1 A g <sup>-1</sup> | 68.8% (from 1 A g <sup>-1</sup> to 10 A g <sup>-1</sup> )   | 3.13 mg cm <sup>-2</sup> | 10        |
| Ni-Co LDH nanocages                          | 1203 F g <sup>-1</sup> at 1 A g <sup>-1</sup> | 78.1% (from 1 A g <sup>-1</sup> to 10 A g <sup>-1</sup> )   | n.a.                     | 16        |
| Co <sub>x</sub> S@MnO <sub>2</sub>           | 1635 F g <sup>-1</sup> at 1 A g <sup>-1</sup> | 70.9% (from 1 A g <sup>-1</sup> to 10 A g <sup>-1</sup> )   | 1.0mg cm <sup>-2</sup>   | 18        |
| Co-Co LDH nanocages                          | 1205 F g <sup>-1</sup> at 1 A g <sup>-1</sup> | 60.3% (from 1 A g <sup>-1</sup> to 6.67 A g <sup>-1</sup> ) | n.a.                     | 20        |
| Ni-Co nanocages LDH/graphene                 | 1265 F g <sup>-1</sup> at 1 A g <sup>-1</sup> | 50.1% (from 1A g <sup>-1</sup> to 10 A g <sup>-1</sup> )    | 3.47 mg cm <sup>-2</sup> | 46        |
| rGO/Ag NW/NiAl LDH                           | 1148 F g <sup>-1</sup> at 1 A g <sup>-1</sup> | 63.4% (from 1A g <sup>-1</sup> to 10 A g <sup>-1</sup> )    | 1.0 mg cm <sup>-2</sup>  | 49        |
| MnO <sub>2</sub> /LDH/CFs                    | 944 F g <sup>-1</sup> at 1 A g <sup>-1</sup>  | 71.4% (from 1 A g <sup>-1</sup> to 10 Ag <sup>-1</sup> )    | 1.2 mg cm <sup>-2</sup>  | 50        |
